# Supplementary material for: Sb&Sb2O3@C-enhanced flexible carbon cloth as an advanced self-supporting anode for sodium-ion batteries
Source: Royal Society of Chemistry journal article supplement (doi:10.1039/d0nj00569j), 2020-01-01
Supplement: d0nj00569j1.pdf [file d0nj00569j1.pdf]

## Supporting Information

### **Sb&Sb<sub>2</sub>O<sub>3</sub>@C-Enhanced Flexible Carbon Cloth as an Advanced Self-supporting Anode for Sodium-ion Batteries**

Shu-Zhi Cao,<sup>a</sup> Ying Su,<sup>a</sup> He-yang Zhang,<sup>a</sup> Zhen-Yi Gu,<sup>b</sup> Xu Yang,<sup>c</sup> Bo Zhao,<sup>a</sup> Xing-Long Wu,<sup>\*abc</sup> and Guang Wang<sup>\*a</sup>

<sup>a</sup> Faculty of Chemistry, Northeast Normal University, Changchun, Jilin, 130024, P. R. China.

<sup>b</sup> Key Laboratory for UV Light-Emitting Materials and Technology of Ministry of Education, Northeast Normal University, Changchun, Jilin 130024, P. R. China.

<sup>c</sup> National & Local United Engineering Laboratory for Power Batteries, Faculty of Chemistry, Northeast Normal University, Changchun, Jilin 130024, P. R. China.

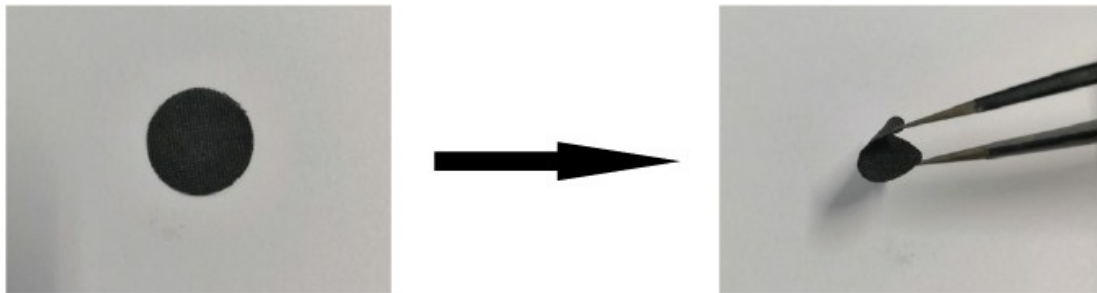

**Figure S1.** Digital photographs of Sb&Sb<sub>2</sub>O<sub>3</sub>@C/CC electrode materials. The left is well-prepared Sb&Sb<sub>2</sub>O<sub>3</sub>@C/CC and the right is the electrode under bending condition.

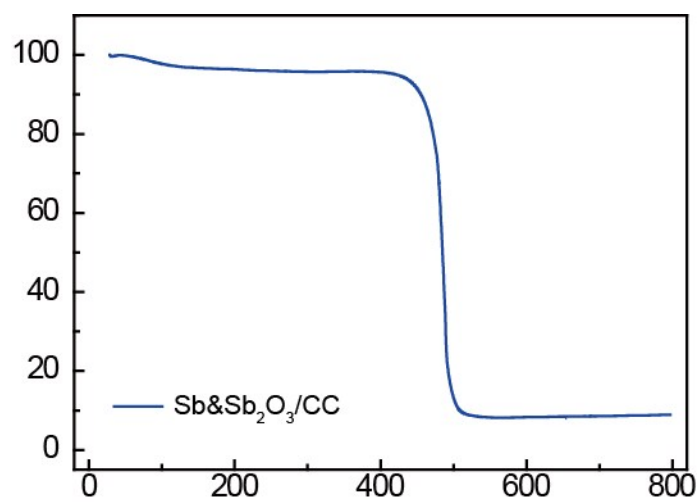

**Figure S2.** TG curve of Sb&Sb<sub>2</sub>O<sub>3</sub>/CC

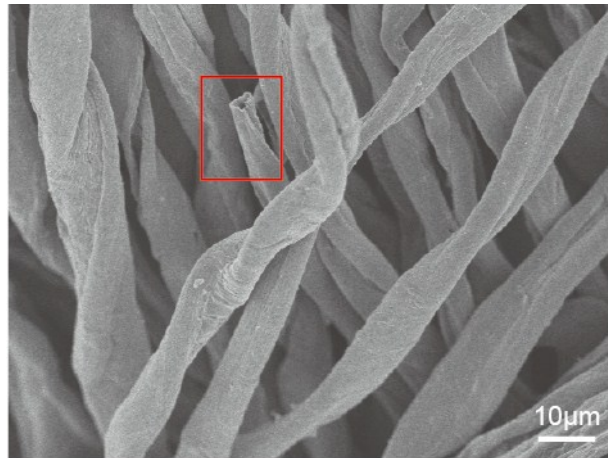

**Figure S3.** SEM of CC. The red frame in the diagram shows that carbon fibers are hollow structure.

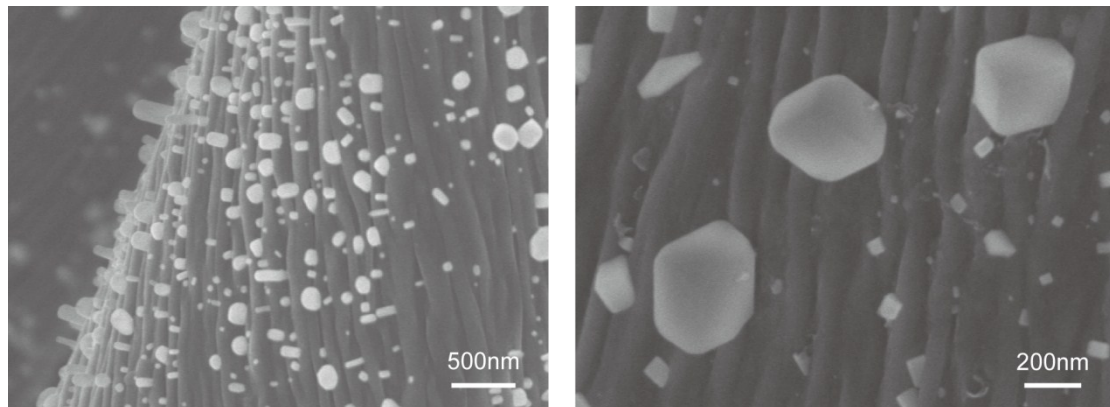

**Figure S4.** SEM of Sb&Sb<sub>2</sub>O<sub>3</sub>/CC

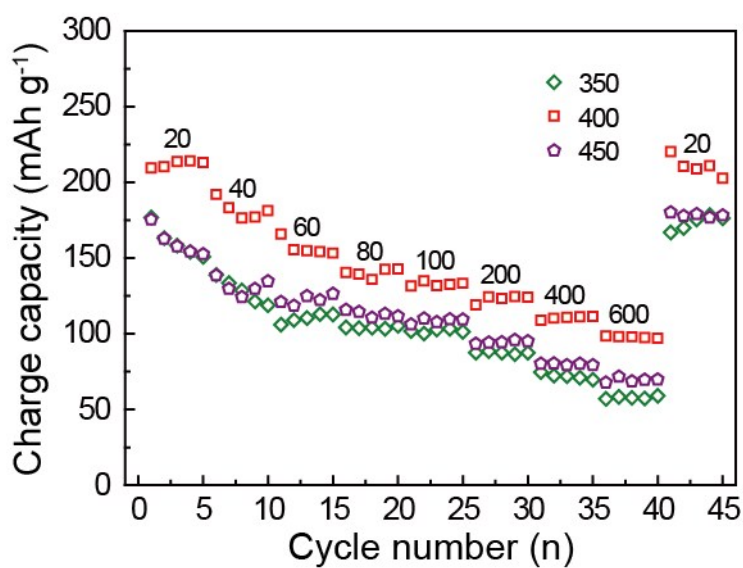

**Figure S5.** Rate performance of Sb&Sb<sub>2</sub>O<sub>3</sub>@C/CC electrodes at different annealing temperatures (current density: 20 to 600 mA g<sup>-1</sup>).

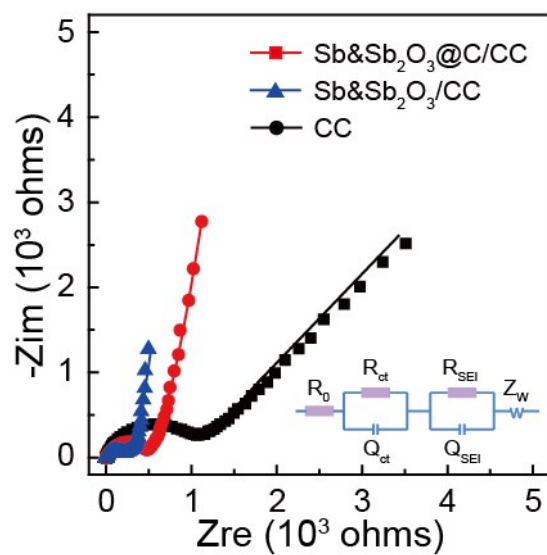

**Figure S6.** Nyquist plots of Sb&Sb<sub>2</sub>O<sub>3</sub>@C/CC, Sb&Sb<sub>2</sub>O<sub>3</sub>/CC and CC electrodes.
